# Supplementary material
Source: Springer Nature journal article supplement (https://www.springermedizin.de/resource/supplementary/13023_2013_628_MOESM8_ESM.pdf/9642548)

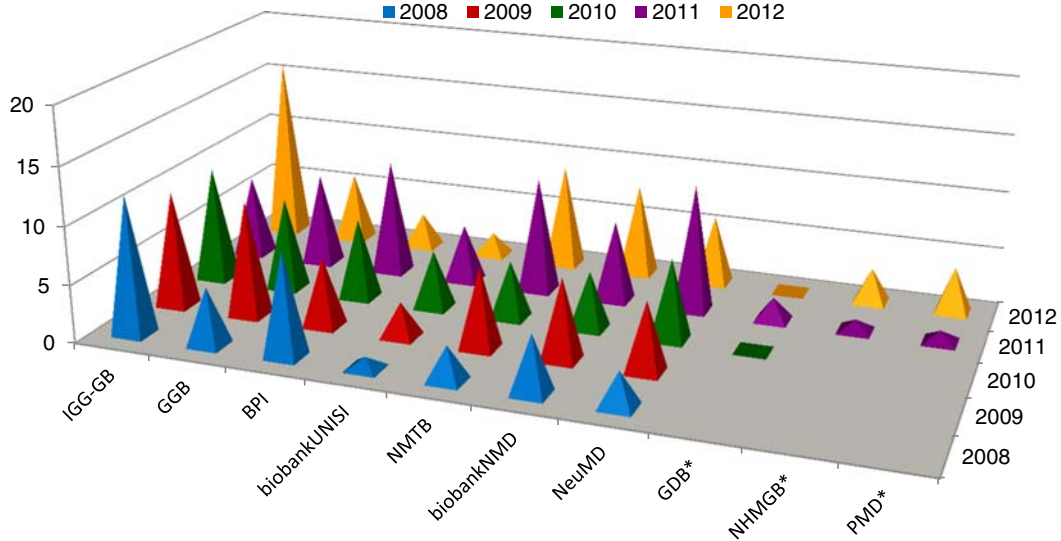

|      | IGG-GB | GGB | BPI | biobankUNIS | NMTB | biobankNMD | NeuMD | GDB* | NHMGB* | PMD* |
|------|--------|-----|-----|-------------|------|------------|-------|------|--------|------|
| 2008 | 12     | 5   | 9   | 1           | 3    | 5          | 3     | 0    | 0      | 0    |
| 2009 | 10     | 10  | 6   | 3           | 7    | 7          | 6     | 0    | 0      | 0    |
| 2010 | 10     | 8   | 7   | 5           | 5    | 5          | 7     | 0    | 0      | 0    |
| 2011 | 7      | 8   | 10  | 5           | 10   | 7          | 11    | 2    | 1      | 1    |
| 2012 | 16     | 6   | 3   | 2           | 9    | 8          | 6     | 0    | 3      | 4    |

Supplement: MOESM8 [file 9642548]
